# Supplementary material for: Metagenomic analysis of coprolites from three Late Pleistocene megaherbivores from the Southwestern United States
Source: bioRxiv or medRxiv preprint supplement (doi:10.1101/2022.05.06.490351), 2022-05-06
Supplement: Supplementary file [file media-1.pdf]

1 **METAGENOMIC ANALYSIS OF COPROLITES FROM THREE LATE**  
2 **PLEISTOCENE MEGAHERBIVORES FROM THE SOUTHWESTERN UNITED**  
3 **STATES.**

4 Tomos O. Prys-Jones<sup>1</sup>, Tara N. Furstenau<sup>1</sup>, Andrew J. Abraham<sup>1</sup>, Isaac N. Shaffer<sup>1</sup>, Colin J.  
5 Sobek<sup>2</sup>, Jordyn R. Upton<sup>2</sup>, Samantha N. Hershauer<sup>2</sup>, Kelvin Wong<sup>3</sup>, Marirosa Molina<sup>3</sup>,  
6 Sebastian Menke<sup>4</sup>, Jim I. Mead<sup>5,6</sup>, Christopher H. Ebert<sup>7</sup>, Mariah S. Carbone<sup>7</sup>, Edward A.G.  
7 Schuur<sup>7</sup>, Faith M. Walker<sup>2</sup>, Viachelsav Y. Fofanov<sup>1,2</sup>, and Christopher E. Doughty<sup>1</sup>

8 <sup>1</sup> School of Informatics, Computing and Cyber Systems, Northern Arizona University,  
9 Flagstaff, Arizona, USA.

10 <sup>2</sup> Pathogen and Microbiome Institute, Northern Arizona University, Flagstaff, Arizona, USA.

11 <sup>3</sup> Office of Research and Development, US Environmental Protection Agency, Durham, North  
12 Carolina, USA.

13 <sup>4</sup> Evolutionary Ecology and Conservation Genomics, University of Ulm, Ulm, Germany.

14 <sup>5</sup> The Mammoth Site, Hot Springs, South Dakota, USA.

15 <sup>6</sup> Desert Laboratory at Tumamoc Hill, University of Arizona, Tucson, Arizona, USA.

16 <sup>7</sup> Center for Ecosystem Science and Society, Northern Arizona University, Flagstaff,  
17 Arizona, USA.

18 Corresponding author:

19 Tomos O. Prys-Jones<sup>1</sup>

20 1331 East Hatcher Drive, Flagstaff, Arizona, USA

21 Email address: [tomos.prysjones@gmail.com](mailto:tomos.prysjones@gmail.com)

22 **Keywords:** megafauna, mammoth, bison, ground sloth, metagenomics, microbiome, coprolite,  
23 desiccation.

24

25        **1. SUPPLEMENTARY INFORMATION**

26        **COPROLITE COLLECTION SITES**

27        **Bison sp.:** Mammoth Alcove is a medium-sized shelter at 1188 m elevation with a south-  
28        southeast exposure, whereas Grobot Grotto and Hooper's Hollow are both large south-facing  
29        alcoves close together, located at 1189 m and 1204 m elevation, respectively (Mead and  
30        Agenboard, 1989).

31        **Shasta ground sloth:** Two locations in Arizona, Muav and Rampart Caves, discovered in the  
32        early 1930s at an elevation of approximately 426 m and 530 m, and found to contain rich  
33        deposits of Late Pleistocene fossils and fecal material (Martin, Sabels and Shutler, 1961;  
34        Long and Martin, 1974; Hansen, 1978; Martin, Thompson and Long, 1985; Schmidt,  
35        Duszynski and Martin, 1992; Poinar *et al.*, 1998, 2003; Hofreiter *et al.*, 2000).

36        **Mammoth:** Bechan cave is a large sandstone grotto at 1280 m elevation, 52.8 m in depth,  
37        and identified in 1982 as containing a blanket layer of dry dung (Davis *et al.*, 1984; Mead *et*  
38        *al.*, 1986; Martin, 1987; Agenbroad and Mead, 1989; Mead and Agenboard, 1989).

39

## 2. SUPPLEMENTARY TABLES AND FIGURES

| Species                                                            | Storage site                                  | NPS*<br>Accession<br>number | Collection sites          | Study identification<br>numbers | Radiocarbon dates $\pm$ error | 95% probability date ranges (ybp) |
|--------------------------------------------------------------------|-----------------------------------------------|-----------------------------|---------------------------|---------------------------------|-------------------------------|-----------------------------------|
| Shasta ground<br>sloth<br>( <i>Nothrotheriops<br/>shastensis</i> ) | Grand<br>Canyon<br>National<br>Park<br>Museum | 4597                        | Rampart Cave, Mohave, AZ  | GRCA-59574                      | 10,927 $\pm$ 27               | 10,946 – 10,808                   |
|                                                                    |                                               |                             |                           |                                 | 11,240 $\pm$ 27               | 11,225 – 11,147                   |
|                                                                    |                                               |                             |                           |                                 | 10,873 $\pm$ 26               | 10,884 – 10,797                   |
|                                                                    |                                               |                             |                           |                                 | 11,351 $\pm$ 27               | 11,353 – 11,222                   |
|                                                                    |                                               |                             |                           |                                 | 11,338 $\pm$ 26               | 11,351 – 11,217                   |
|                                                                    |                                               | 4712                        | Muav cave, Mohave, AZ     | GRCA-59511                      | 11,180 $\pm$ 27               | 11,214 – 11,136                   |
|                                                                    |                                               | GRCA-4712                   | 11,446 $\pm$ 27           | 11,470 – 11,289                 |                               |                                   |
|                                                                    |                                               |                             |                           | 11,232 $\pm$ 27                 | 11,221 – 11,147               |                                   |
|                                                                    |                                               |                             |                           | 11,412 $\pm$ 28                 | 11,155 – 10,979               |                                   |
|                                                                    |                                               |                             |                           | 11,412 $\pm$ 28                 | 11,396 – 11,231               |                                   |
|                                                                    |                                               |                             |                           | 11,093 $\pm$ 27                 | 11,146 – 10,976               |                                   |
|                                                                    |                                               |                             |                           | 11,231 $\pm$ 28                 | 11,221 – 11,146               |                                   |
| Paleontological<br>bison<br>( <i>Bison sp.</i> )                   | Museum of<br>Northern<br>Arizona              | 82                          | Mammoth Alcove, Kane, UT  | GLCA-821                        | 18,611 $\pm$ 34               | 20,688 – 20,425                   |
|                                                                    |                                               |                             | Grobot Grotto, Kane, UT   | GLCA-877                        | 18,806 $\pm$ 35               | 20,982 – 20,592                   |
|                                                                    |                                               |                             | Hooper's Hollow, Kane, UT | GLCA-900                        | 15,479 $\pm$ 30               | 16,903 – 16,772                   |
| Columbian<br>mammoth<br>( <i>Mammuthus<br/>columbi</i> )           | Museum of<br>Northern<br>Arizona              | 81                          | Bechan Cave, Kane, UT     | GLCA-372                        | 12,304 $\pm$ 29               | 12,856 – 12,143                   |
|                                                                    |                                               |                             |                           | GLCA-370                        | 12,456 $\pm$ 29               | 12,992 – 12,383                   |
|                                                                    |                                               |                             |                           | GLCA-367                        | 12,430 $\pm$ 30               | 12,923 – 12,352                   |
|                                                                    |                                               |                             |                           | GLCA-2578                       | 12,401 $\pm$ 30               | 12,896 – 12,315                   |
|                                                                    |                                               |                             |                           | GLCA-382                        | 12,426 $\pm$ 30               | 12,915 – 12,349                   |
|                                                                    |                                               |                             |                           | GLCA-2627                       | 12,427 $\pm$ 29               | 12,915 – 12,351                   |

42 **Table S1.** Summary of collection information, study identification numbers, AMS radiocarbon dates, as well as the number of reads and queries  
43 obtained from paleontological coprolite samples included in the study: Shasta ground sloth, paleontological bison, and Columbian mammoth  
44 (top to bottom). Multiple samples were run for Shasta ground sloth coprolites. The 95% date ranges were calculated using OxCAL version 4.4  
45 (Ramsey, 2009) and atmospheric data from Reimer *et al.*, (2020).

| P1:<br>Kmer query size |    | X | P2:<br>No edits |   | X | P3:<br>Binning mode |           |           | X | P4:<br>Minimum threshold for USH* |     |     |     |     |     |      |      |      |      |
|------------------------|----|---|-----------------|---|---|---------------------|-----------|-----------|---|-----------------------------------|-----|-----|-----|-----|-----|------|------|------|------|
| 36                     | 50 |   | 3               | 5 |   | Fast                | Efficient | Sensitive |   | 0                                 | 200 | 400 | 600 | 800 | 100 | 1200 | 1400 | 1600 | 1800 |

46

47 **Table S2.** The combination of parameters (P1-4) used for MTSv runs on 1,000,000 simulated gargammel aDNA reads. Kmer query length refers  
48 to the size of the deduplicated queries generated by the binning-analysis pipeline. Edits represents the threshold number of mismatches between  
49 a query and reference. Binning mode represents the combination of parameters (seed size, minimum seeds, and seed gap; parameter order  
50 respective hereafter) used by the assignment algorithm during binning. We used three binning modes during this study: fast (17, 5, 2), efficient  
51 (14, 4, 2), and sensitive (11, 3, 1). (\* the USH threshold was converted into a proportion of the total USH generated by the MTSv run).

52

53  
54  
55  
56  
57  
58  
59  
60  
61  
62  
63  
64  
65  
66  
67  
68  
69  
70  
71

### Class:

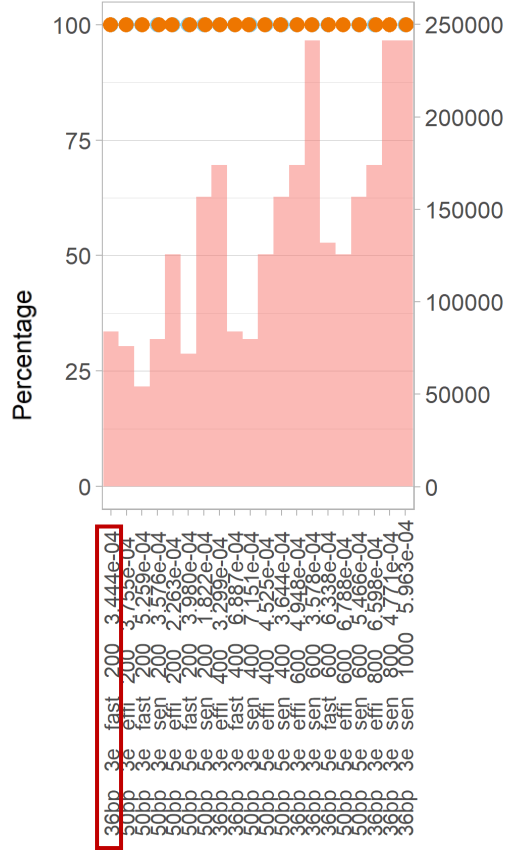

### Order:

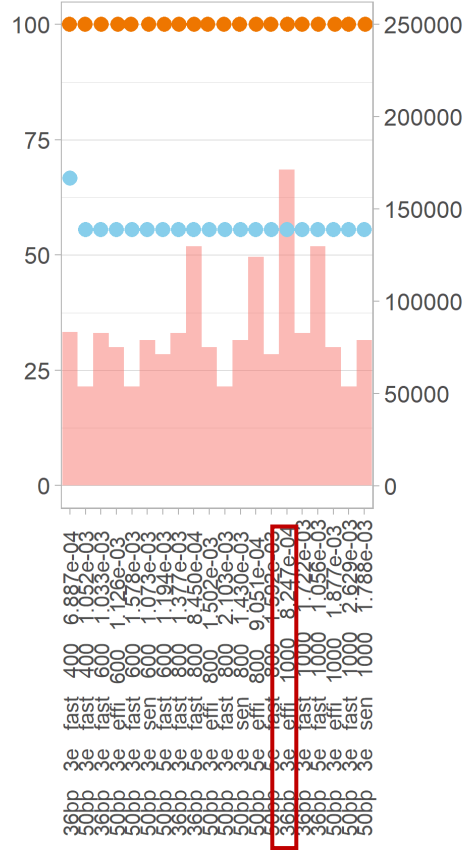

### Family:

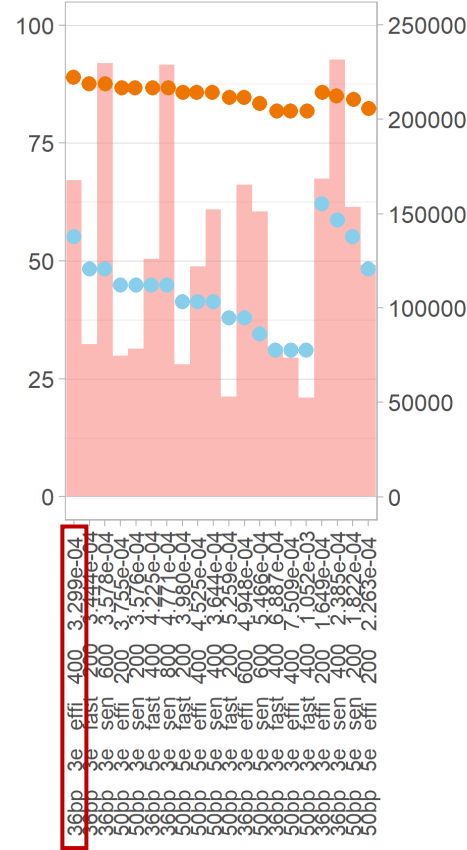

Total USH used

#### MTSv classification performance metrics:

- Identification positive predictive value
- Identification sensitivity

#### MTSv output:

- Unique signature hits (USH)

Parameters (query length; number of edits permitted; alignment sensitivity; number and proportion of USH threshold)

72 **Figure S1.** The top 20 MTSv runs in identifying the classes, orders and families associated with the reads from 200 firmicute species processed  
73 by gargammel to include age-related changes. These runs were ranked in descending order of positive predictive values (orange points) and  
74 sensitivity scores (blue points). MTSv runs differed in the query lengths, number of edits permitted between a query and reference, the  
75 sensitivity of alignment (determined by alignment parameters summarized in Table S2), and the minimum number of USH for taxon inclusion  
76 (converted to a proportion of the total USH), as well as the total number of USH used by the classifier (pale pink histogram). Highlighted MTSv  
77 runs indicate the parameter combination selected for further downstream analyses of coprolites (36bp query length, 3 edits between query and  
78 reference and efficient alignment, with USH thresholds varying for different taxonomic levels).

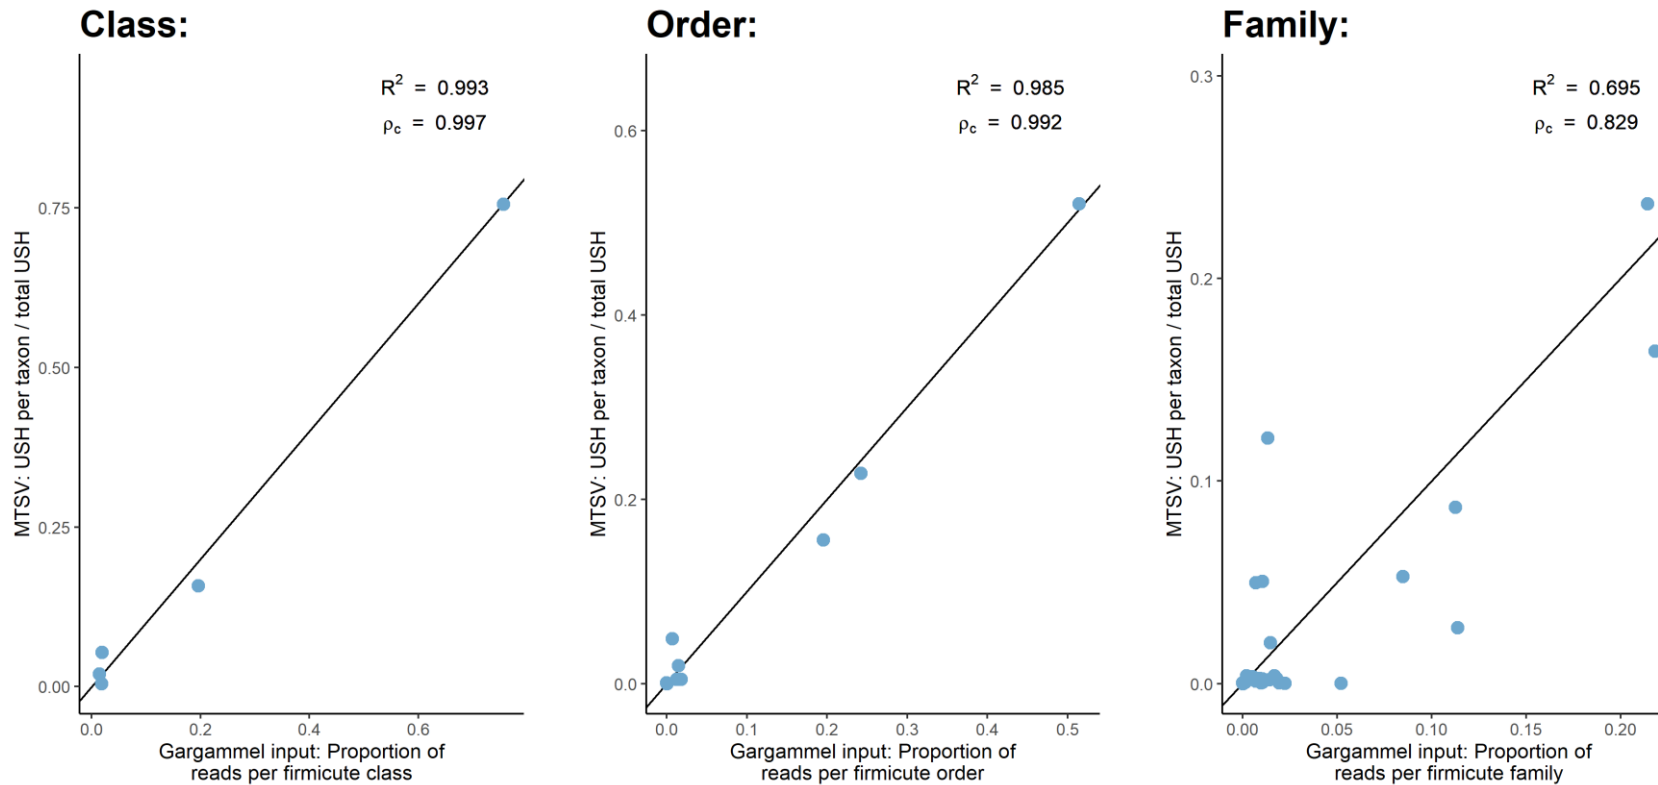

79

80 **Figure S2.** The relative abundance of gargammel reads from each taxon versus the proportion of USH identified by MTSv at the class, order,  
 81 and family levels. The points displayed came from the MTSv run parameterized for a 36 bp query length, 3 edits and an efficient alignment  
 82 mode. Each comparison shows the  $R^2$  value of the points away from a 1-to-1 line as well as Lin's concordance correlation coefficient ( $\rho_c$ ). The  
 83 figure highlights that MTSv USHs are a good indicator of bacterial abundance at taxonomic levels above family.



| Species                            | Kingdom   | Phylum: percentage                                                                                                                                                                                                                                    |
|------------------------------------|-----------|-------------------------------------------------------------------------------------------------------------------------------------------------------------------------------------------------------------------------------------------------------|
| <i>Bison bison</i> (modern)        | Archaea   | Euryarchaeota: 13.1743890722925                                                                                                                                                                                                                       |
|                                    | Bacteria  | Firmicutes: 67.5520625769282,<br>Bacteroidetes: 7.44743119898517,<br>Actinobacteria: 4.20642352093039,<br>Proteobacteria: 2.64228434768255                                                                                                            |
|                                    | Eukaryota | Streptophyta: 2.98733840850779                                                                                                                                                                                                                        |
| <i>Bradypus variegatus</i>         | Archaea   | Euryarchaeota: 7.82385380631297                                                                                                                                                                                                                       |
|                                    | Bacteria  | Verrucomicrobia: 35.3748023500362,<br>Bacteroidetes: 34.9505239153169,<br>Firmicutes: 9.5333940320368,<br>Proteobacteria: 8.00912507747584,<br>Lentisphaerae: 2.60800869647104,<br>Actinobacteria: 1.09013993949783                                   |
|                                    | Eukaryota | Streptophyta: 5.96165209225422                                                                                                                                                                                                                        |
| <i>Loxodonta africana</i>          | Archaea   | Euryarchaeota: 1.53448308845536                                                                                                                                                                                                                       |
|                                    | Bacteria  | Proteobacteria: 47.1217352111144,<br>Bacteroidetes: 16.5815399968847,<br>Firmicutes: 16.1444151957561,<br>Verrucomicrobia: 3.49460616137364,<br>Actinobacteria: 3.46800601395302,<br>Spirochaetes: 1.36889802527466,<br>Tenericutes: 1.02575840554082 |
|                                    | Eukaryota | Streptophyta: 5.96165209225422                                                                                                                                                                                                                        |
| <i>Bison sp.</i> (paleontological) | Bacteria  | Actinobacteria: 49.9242291884496,<br>Proteobacteria: 34.2753071984631,<br>Firmicutes: 15.4635984544028                                                                                                                                                |
| <i>Mammuthus columbi</i>           | Bacteria  | Actinobacteria: 51.66045226374,<br>Proteobacteria: 44.5132985506531,<br>Firmicutes: 3.47683619907833                                                                                                                                                  |
| <i>Nothrotheriops shastensis</i>   | Bacteria  | Actinobacteria: 39.8043818948311,<br>Firmicutes: 37.8428912509215,<br>Proteobacteria: 14.7871067207959,<br>Bacteroidetes: 6.25992283764298                                                                                                            |

85

86 **Supplementary Table 3.** The percentages of the dominant phyla (>1% USH) per kingdom  
87 for each paleontological and modern species. The majority of USHs from paleontological  
88 samples were assigned to Actinobacteria and Proteobacteria, with a high percentage of  
89 Firmicutes detected in the coprolites of *N. shastensis*.

90

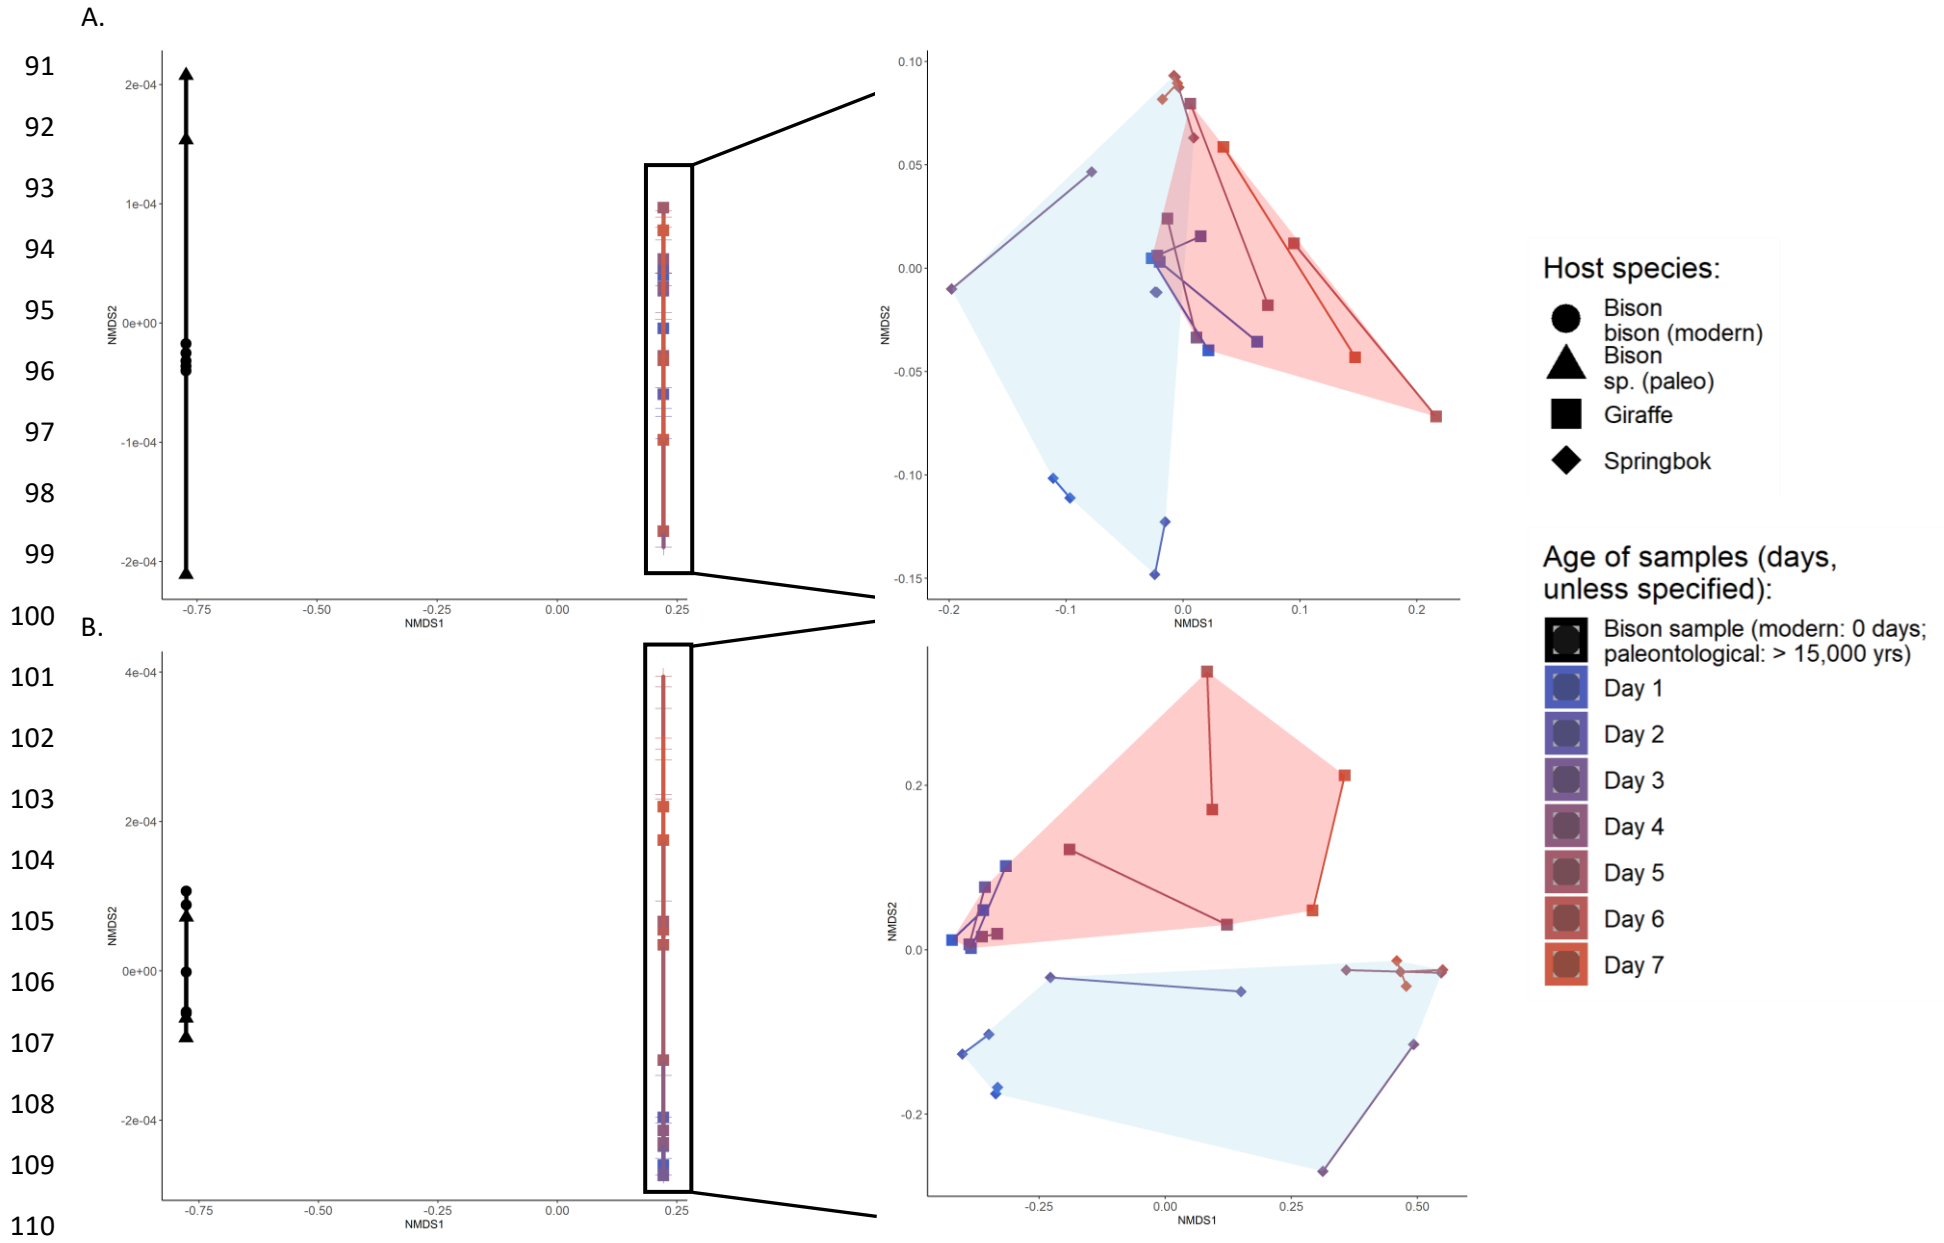

111 **Figure S3.** The left-hand NMDS plots show the dissimilarity between paleontological bison, modern bison, and desiccated samples from Menke  
112 et al (2015) at the phylum (A) and class (B) levels. For each taxonomic level, the right-hand NMDS plots show the Menke et al (2015) giraffe  
113 and springbok samples (pink and blue convex hulls, respectively) after ordination was repeated without the bison samples. This was done to  
114 show the separation of points along a continuum from fresh to desiccated.

115

116

117

118

119

120

121

122

123

124

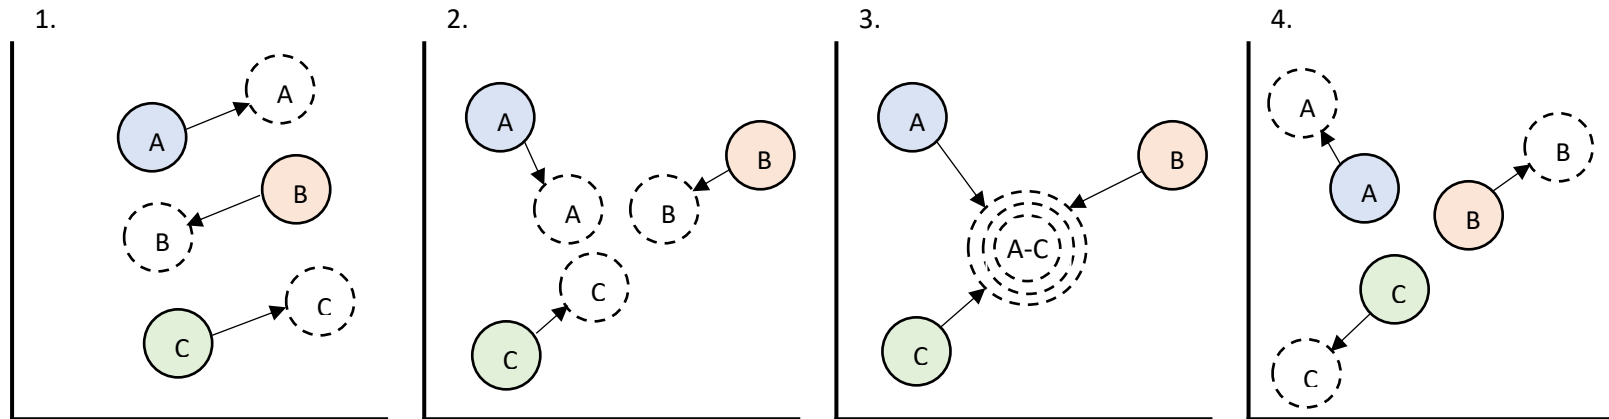

125 **Figure S4.** Hypothetical ordination plots showing how the distinctiveness of microbiomes in fresh fecal samples from different host species  
126 (clusters represented as solid shaded circles A - C) might change during desiccation studies (clusters as dashed circles A - C). The four plots  
127 represent situations during desiccation in which the beta diversity of the three samples: 1) does not change, 2) converges somewhat, 3) converges  
128 completely, and 4) increases. In plots 1, 2, and 4, the original microbiome may be inferred from the desiccated samples. However, the complete  
129 convergence of desiccated microbiomes in plot 3 would prevent this.

130 **SUPPLEMENTARY REFERENCES**

- 131 Agenbroad, L. D. and Mead, J. I. (1989) 'Quaternary geochronology and distribution of  
132 Mammuthus on the Colorado Plateau', *Geology*, 17(9), p. 861. doi: 10.1130/0091-  
133 7613(1989)017<0861:QGADOM>2.3.CO;2.
- 134 Davis, O. K. *et al.* (1984) 'The pleistocene dung blanket of bechan cave utah usa', *Carnegie*  
135 *Museum of Natural History Special Publication*, 8, pp. 267–282. Available at:  
136 <https://eurekamag.com/research/006/736/006736284.php> (Accessed: 19 October 2021).
- 137 Hansen, R. M. (1978) 'Shasta ground sloth food habits, Rampart Cave, Arizona',  
138 *Paleobiology*. doi: 10.1017/S0094837300006011.
- 139 Hofreiter, M. *et al.* (2000) 'A molecular analysis of ground sloth diet through the last  
140 glaciation', *Molecular Ecology*. doi: 10.1046/j.1365-294X.2000.01106.x.
- 141 Long, A. and Martin, P. S. (1974) 'Death of American ground sloths', *Science*. doi:  
142 10.1126/science.186.4164.638.
- 143 Martin, P. S. (1987) 'Late Quaternary extinctions: The promise of TAMS 14C dating',  
144 *Nuclear Inst. and Methods in Physics Research, B*. doi: 10.1016/0168-583X(87)90232-1.
- 145 Martin, P. S., Sabels, B. E. and Shutler, D. (1961) 'Rampart Cave coprolite and ecology of  
146 the shasta ground sloth', *American Journal of Science*. doi: 10.2475/ajs.259.2.102.
- 147 Martin, P. S., Thompson, R. S. and Long, A. (1985) 'Shasta ground sloth extinction: a test of  
148 the blitzkrieg model.', *Environments and extinctions: man in late glacial North America*,.
- 149 Mead, J. and Agenboard, L. (1989) 'Pleistocene dung and the extinct herbivores of the  
150 Colorado Plateau, Southwestern USA', *Cranium*, 6(1), pp. 29–44.
- 151 Mead, J. I. *et al.* (1986) 'Dung of Mammuthus in the arid Southwest, North America',  
152 *Quaternary Research*. doi: 10.1016/0033-5894(86)90048-7.
- 153 Poinar, H. *et al.* (2003) 'Nuclear gene sequences from a late Pleistocene sloth coprolite',  
154 *Current Biology*. doi: 10.1016/S0960-9822(03)00450-0.
- 155 Poinar, H. N. *et al.* (1998) 'Molecular coproscopy: Dung and diet of the extinct ground sloth  
156 *Nothrotheriops shastensis*', *Science*. doi: 10.1126/science.281.5375.402.
- 157 Ramsey, C. B. (2009) 'Bayesian Analysis of Radiocarbon Dates', *Radiocarbon*. Cambridge  
158 University Press, 51(1), pp. 337–360. doi: 10.1017/S0033822200033865.
- 159 Reimer, P. J. *et al.* (2020) 'The IntCal20 Northern Hemisphere Radiocarbon Age Calibration  
160 Curve (0-55 cal kBP)', *Radiocarbon*. Cambridge University Press, 62(4), pp. 725–757. doi:  
161 10.1017/RDC.2020.41.
- 162 Schmidt, G. D., Duszynski, D. W. and Martin, P. S. (1992) 'Parasites of the extinct shasta  
163 ground sloth, *Nothrotheriops shastensis*, in Rampart Cave, Arizona', *Journal of Parasitology*.  
164 doi: 10.2307/3283310.
